# Supplementary material for: Aerosol Size Distribution Properties Associated with Cold-Air Outbreaks in the Norwegian Arctic
Source: Copernicus journal article supplement (doi:10.5194/egusphere-2024-584), 2024-04-04
Supplement: Supplementary file 1 [file egusphere-2024-584-supplement.pdf]

*Supplement of*

## **Aerosol Size Distribution Properties Associated with Cold-Air Outbreaks in the Norwegian Arctic**

Abigail S. Williams<sup>1</sup>, Jeramy L. Dedrick<sup>1</sup>, Lynn M. Russell<sup>1</sup>, Florian Tornow<sup>2,3</sup>, Ann M. Fridlind<sup>3</sup>, and Israel Silber<sup>4,\*</sup>, Benjamin Swanson<sup>5</sup>, Paul J. DeMott<sup>5</sup>, Paul Zieger<sup>6,7</sup>, and Radovan Krejci<sup>6,7</sup>

<sup>1</sup>Scripps Institution of Oceanography, University of California San Diego, La Jolla, CA, USA

<sup>2</sup>Center for Climate Systems Research, Columbia University, New York, NY, USA

<sup>3</sup>NASA Goddard Institute for Space Studies, New York, NY, USA

<sup>4</sup>Department of Meteorology and Atmospheric Science, Pennsylvania State University, University Park, PA, USA

\*now at Atmospheric, Climate, and Earth Sciences Division, Pacific Northwest National Laboratory, Richland, WA, USA

<sup>5</sup>Department of Atmospheric Science, Colorado State University, Fort Collins, CO, USA

<sup>6</sup>Department of Environmental Science, Stockholm University, Stockholm, Sweden

<sup>7</sup>Bolin Centre for Climate Research, Stockholm University, Stockholm, Sweden

### **Contents**

Text

Text S1.....1

Figures

Figure S1.....2

Tables

Table S1.....3

Table S2.....4

**Text S1.**

A very weak negative correlation between  $D_{\text{HM}}$  and  $N_{\text{HM}}$  ( $r = -0.15$ ,  $p < 0.05$ ) is observed during CAO events at Andenes. If the supersaturation increase were aerosol-limited for non-precipitating low-cloud conditions, then a positive correlation of  $D_{\text{HM}}$  with  $N_{\text{HM}}$  is expected (Dedrick et al., 2024). If the supersaturation is not limited by the number of particles that activate, then  $D_{\text{HM}}$  may be limited by updraft velocity (Chen et al., 2016). No correlation is observed between  $D_{\text{HM}}$  and the updraft velocity retrievals available from Bear Island (COMBLE supplemental site) for time periods corresponding to when air mass trajectories arriving at Andenes passed near Bear Island ( $r = -0.1$ ,  $p > 0.05$ ). The absence of either correlation may result from scavenging of activated particles during precipitation.

**Figure S1.** Measured aerosol size distributions at Zeppelin Observatory (green; upwind) and Andenes (red; downwind) for 15 CAO trajectories (Sect. 4). For subplots (a)-(o), refer to Table S1 for corresponding dates and times.

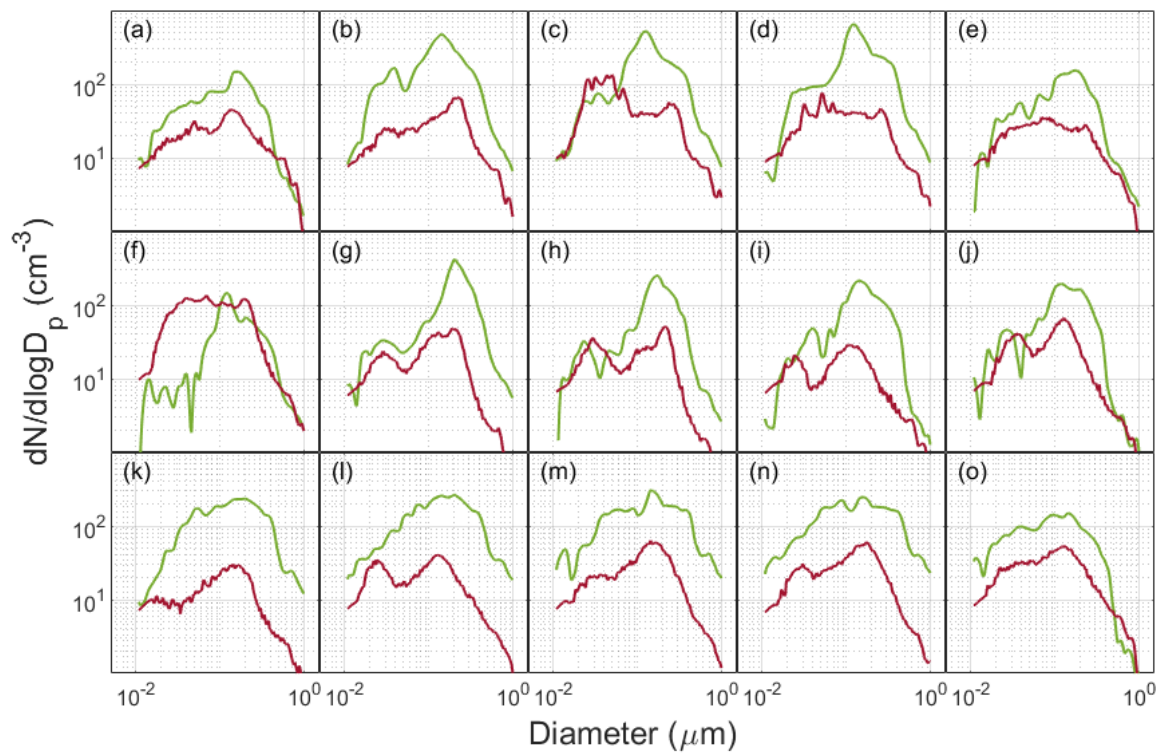

**Table S1.** The dates and times that air masses passing by Zeppelin Observatory arrived at Andenes for each of the 15 CAO trajectories (Sect. 4) shown in Fig. S1.

| Figure S1 subplot | Time ( <i>mm/dd/yy HH:MM in UTC</i> ) of passage by Zeppelin Observatory | Time ( <i>mm/dd/yy HH:MM in UTC</i> ) of arrival at Andenes |
|-------------------|--------------------------------------------------------------------------|-------------------------------------------------------------|
| (a)               | 12/1/19 12:00                                                            | 12/2/19 15:00                                               |
| (b)               | 1/3/20 09:00                                                             | 1/4/20 15:00                                                |
| (c)               | 1/3/20 18:00                                                             | 1/4/20 18:00                                                |
| (d)               | 1/3/20 21:00                                                             | 1/4/20 21:00                                                |
| (e)               | 1/21/20 11:00                                                            | 1/22/20 18:00                                               |
| (f)               | 2/4/20 13:00                                                             | 2/5/20 18:00                                                |
| (g)               | 2/17/20 19:00                                                            | 2/19/20 00:00                                               |
| (h)               | 2/17/20 23:00                                                            | 2/19/20 03:00                                               |
| (i)               | 3/10/20 22:00                                                            | 3/12/20 09:00                                               |
| (j)               | 3/11/20 02:00                                                            | 3/12/20 12:00                                               |
| (k)               | 3/12/20 04:00                                                            | 3/13/20 06:00                                               |
| (l)               | 3/12/20 22:00                                                            | 3/13/20 18:00                                               |
| (m)               | 3/13/20 0:00                                                             | 3/13/20 21:00                                               |
| (n)               | 3/13/20 01:00                                                            | 3/14/20 00:00                                               |
| (o)               | 3/24/20 04:00                                                            | 3/25/20 15:00                                               |

**Table S2.** Summary of reported CCN concentrations and the CCN/CN ratios measured at high latitudes (above 60°N) at supersaturations (SS) near 0.4 %. Values reported are mean except where noted.

| Reference              | CCN (cm <sup>-3</sup> ) | CCN/CN     | SS (%) | Location                  |
|------------------------|-------------------------|------------|--------|---------------------------|
| Moore et al., 2011     | 550 <sup>a</sup>        | ~ 0.90     | 0.42   | Arctic boundary layer     |
| Jung et al., 2018      | 45-81 <sup>b</sup>      | ~ 0.3-0.85 | 0.4    | Zeppelin Observatory      |
| Paramonov et al., 2015 | 31-149                  | ~ 0.08-1.8 | 0.3    | Pallas (Northern Finland) |
|                        | 50-176                  | ~ 0.1-0.38 | 0.5    | Pallas (Northern Finland) |
| Dall'Osto et al., 2017 | 69-117                  | n/a        | 0.4    | Canadian Arctic           |
| Herenz et al., 2018    | 139                     | n/a        | 0.3    | Canadian Arctic           |
|                        | 164                     | n/a        | 0.5    | Canadian Arctic           |
| Zabori et al., 2015    | ~75-230 <sup>b</sup>    | ~ 0.1-0.65 | 0.4    | Zeppelin Observatory      |
| Martin et al., 2011    | 35                      | n/a        | 0.41   | High Arctic               |
| Latham et al., 2013    | 247 <sup>b</sup>        | 0.52       | 0.55   | Arctic                    |

<sup>a</sup>95th percentile

<sup>b</sup>Median

## References

- Chen, J., Liu, Y., Zhang, M., and Peng, Y.: New understanding and quantification of the regime dependence of aerosol-cloud interaction for studying aerosol indirect effects, *Geophysical Research Letters*, 43, 1780–1787, <https://doi.org/10.1002/2016GL067683>, 2016.
- Dedrick, J. L., Russell, L. M., Sedlacek, A. J., III, Kuang, C., Zawadowicz, M. A., & Lubin, D.: Aerosol-correlated cloud activation for clean conditions in the tropical Atlantic boundary layer during LASIC, *Geophysical Research Letters*, 51, e2023GL105798, <https://doi.org/10.1029/2023GL105798>, 2024.
